# Supplementary material
Source: publisher figshare collection journal article supplement (https://acs.figshare.com/ndownloader/files/4062445)
Supplement: Supplementary file 1 [file 4062445]

**Supporting Information for:**

**Synthesis and Characterization of a Novel Symmetrical Sulfone-Substituted Polyphenylene  
Vinylene (SO<sub>2</sub>EH-PPV) for Applications in Light Emitting Devices**

**Emir Hubijar<sup>1</sup>, Alexios Papadimitratos<sup>2</sup>, Anvar Zakhidov<sup>2</sup>, John P. Ferraris<sup>1\*</sup>**

*<sup>1</sup>Department of Chemistry and The Alan G. McDiarmid Nanotech Institute, The University of  
Texas at Dallas, 800 W. Campbell Rd, Richardson, Texas 75080-3021*

*<sup>2</sup> Solarno Inc 153 Hollywood Drive, Coppel, Texas 75019*

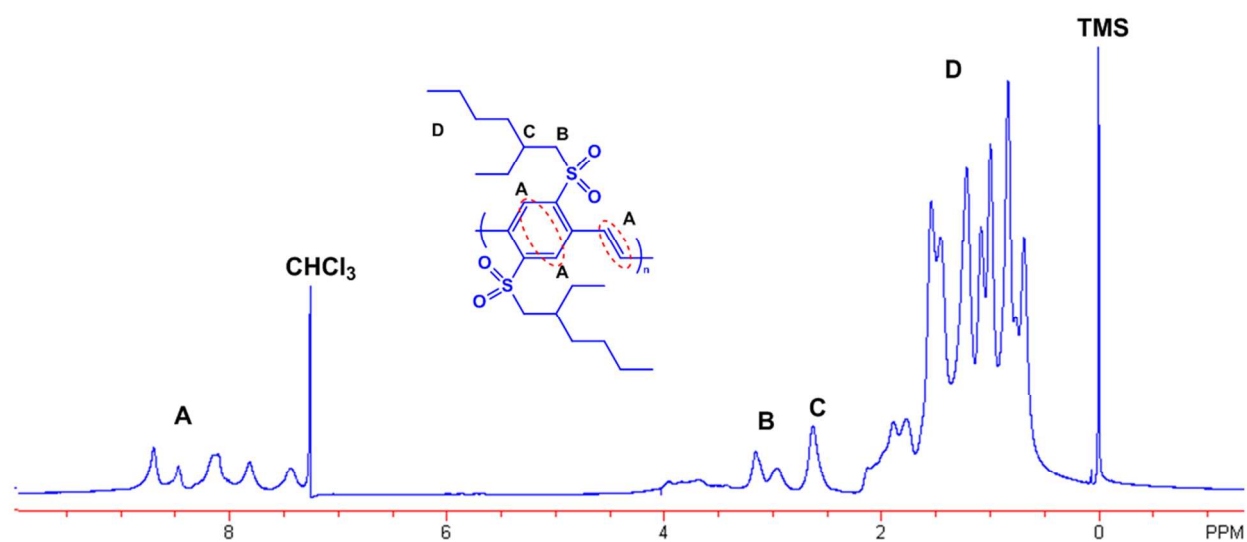

**Figure S1.**  $^1\text{H}$  NMR of polymer (SO<sub>2</sub>EH-PPV)

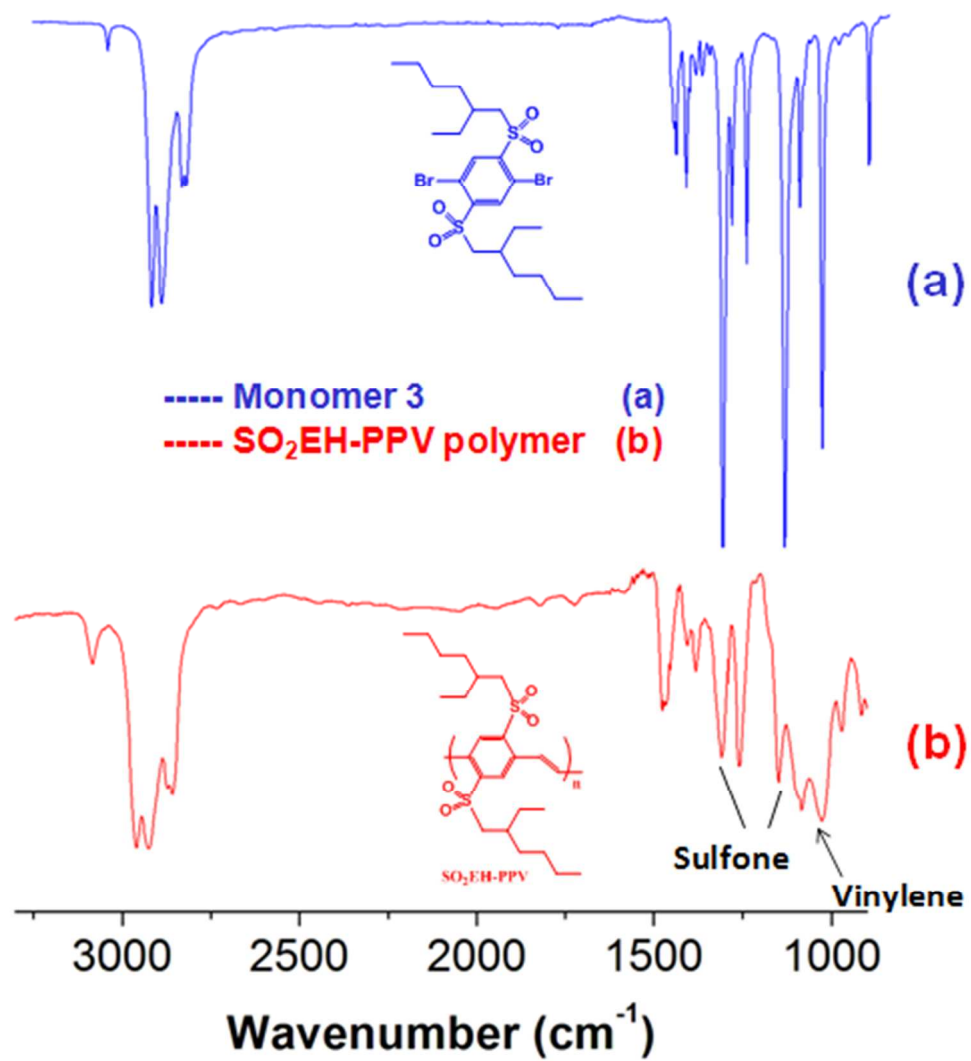

**Figure S2.** IR spectra of monomer 3 and a polymer ( $\text{SO}_2\text{EH-PPV}$ )

**Quantum yield measurements:**<sup>45</sup>

The quantum yield of fluorescence for the polymer SO<sub>2</sub>EH-PPE was determined using Rhodamine 6G ( $\Phi=0.95$ ) as a standard. Quantum yield was determined using the gradients (slope) determined for the sample and the standard. The following equation is used to determine the quantum yield:

$$Q_s = Q_r \left( \frac{Grad_s}{Grad_r} \right) \left( \frac{\eta_s^2}{\eta_r^2} \right)$$

where *Grad* represents the slope obtained from the plot of the integrated fluorescence intensity vs. absorbance. Subscripts *r* and *s* correspond to the reference and sample respectively.  $\eta$  represents the refractive index of the solvent. The fluorescence of the polymer was obtained using chloroform as a solvent and water was used as a solvent for the reference. Quantum yield was determined by preparing both reference and sample solutions with absorbencies between 0.02 to 0.1. The following table 4 below summarizes the results from quantum yield measurements.

| Polymer                | Excitation (nm) | Emission max (nm) | Quantum yield ( $\Phi$ ) |
|------------------------|-----------------|-------------------|--------------------------|
| SO <sub>2</sub> EH-PPV | 442             | 532               | 0.95                     |

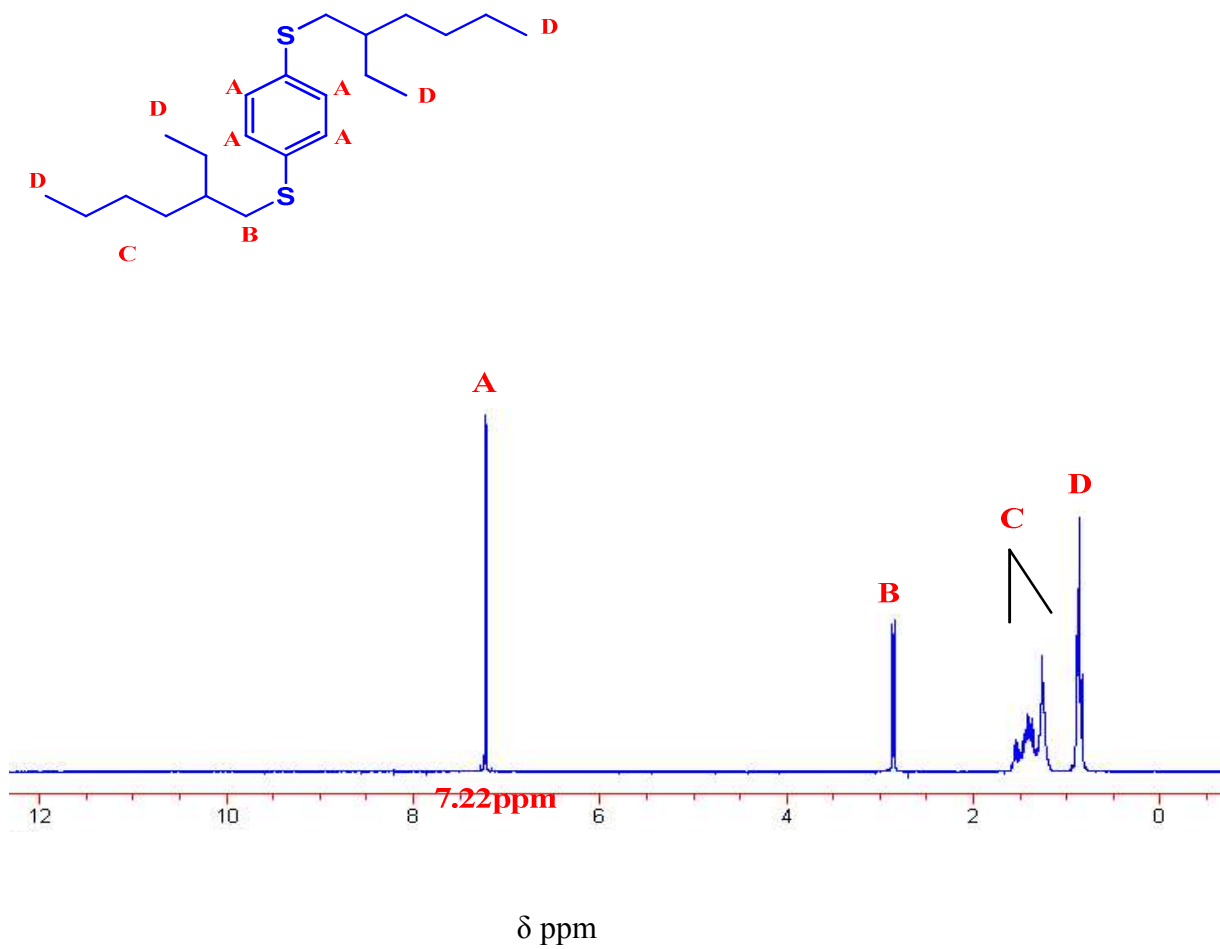

**Figure S3.**  $^1\text{H}$  NMR spectrum of 1,4-bis-(2-ethylhexylthio)benzene (1).

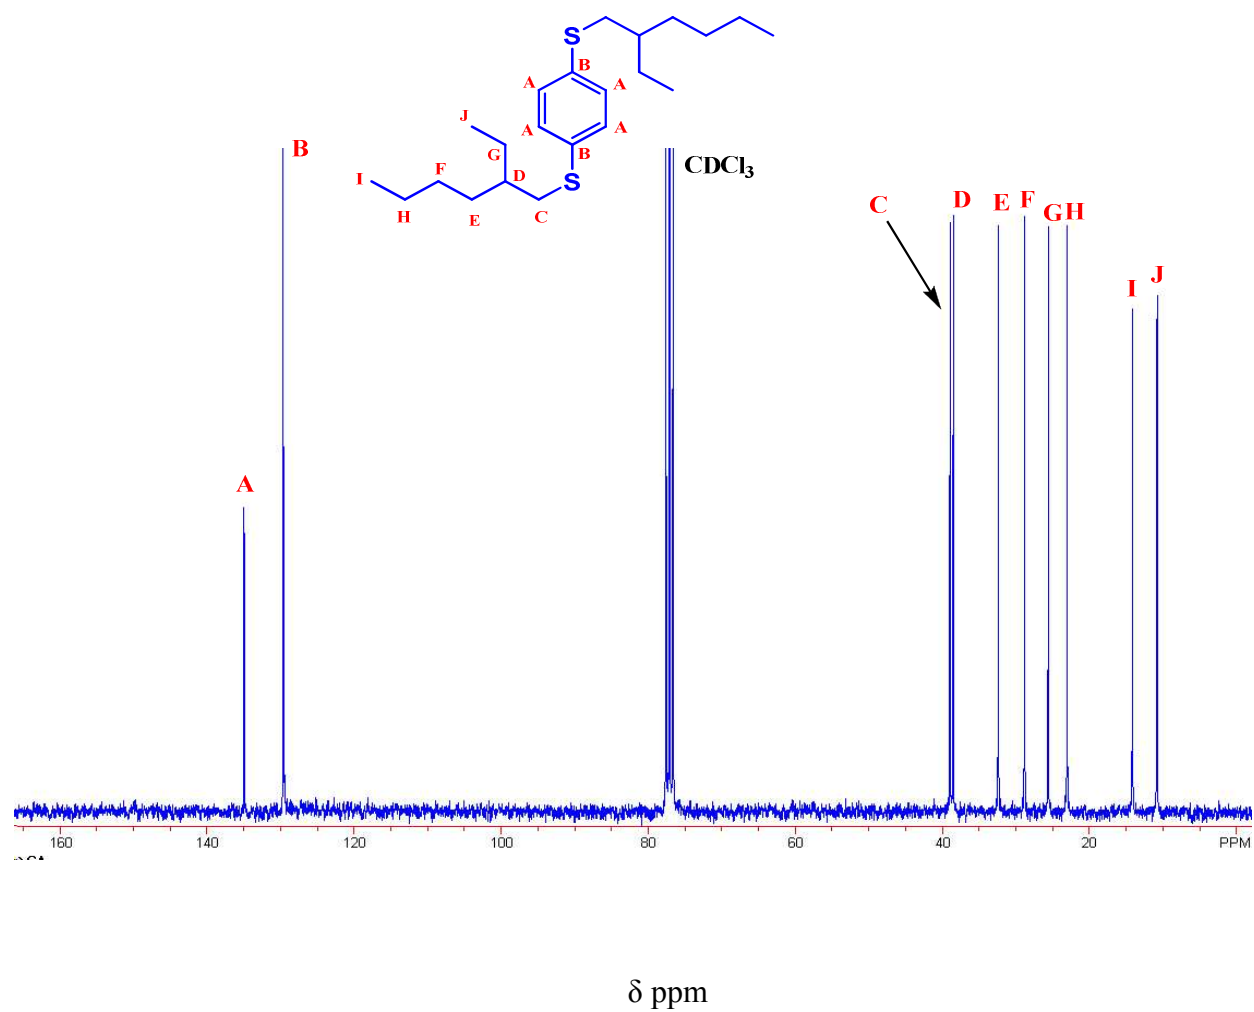

**Figure S4.**  $^{13}\text{C}$  NMR spectrum of 1,4-bis-(2-ethylhexylthio)benzene (**1**).

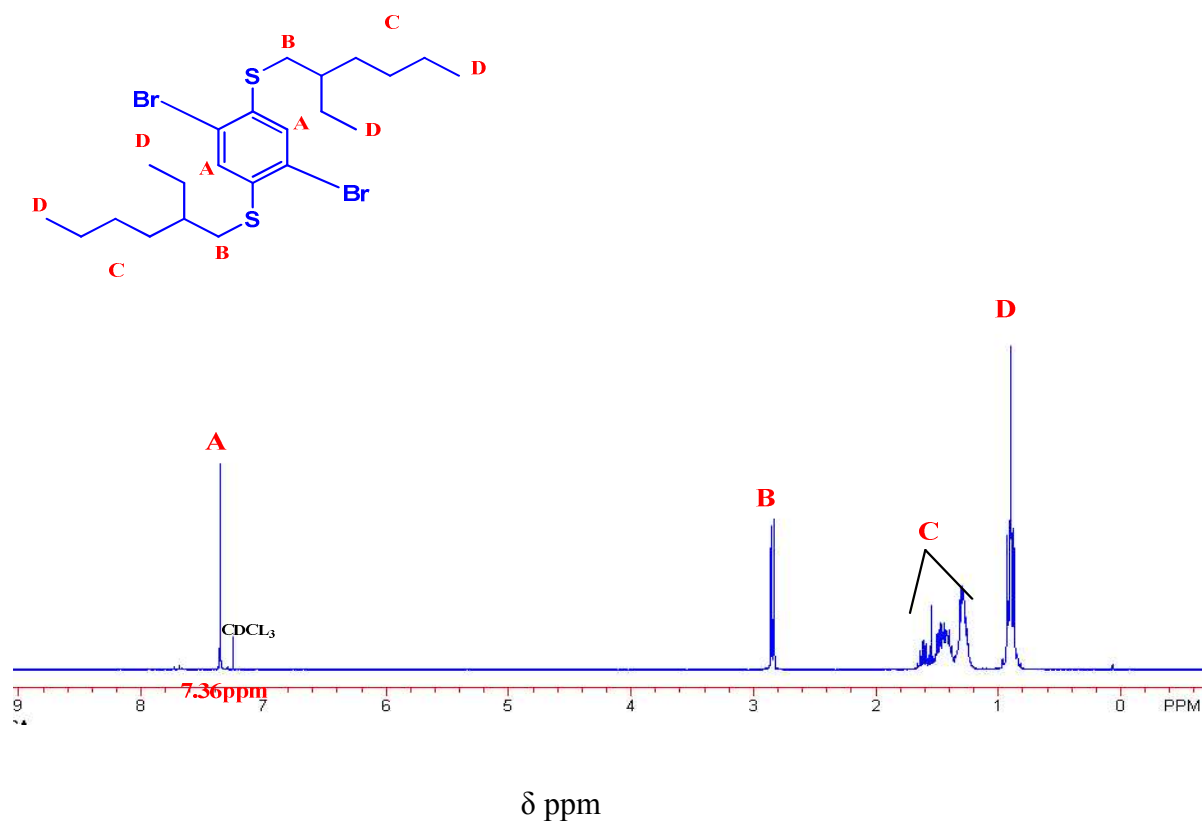

**Figure S5.**  $^1\text{H}$  NMR spectrum of 2,5-dibromo-1,4-bis-(2-ethylhexylthio)benzene (2).

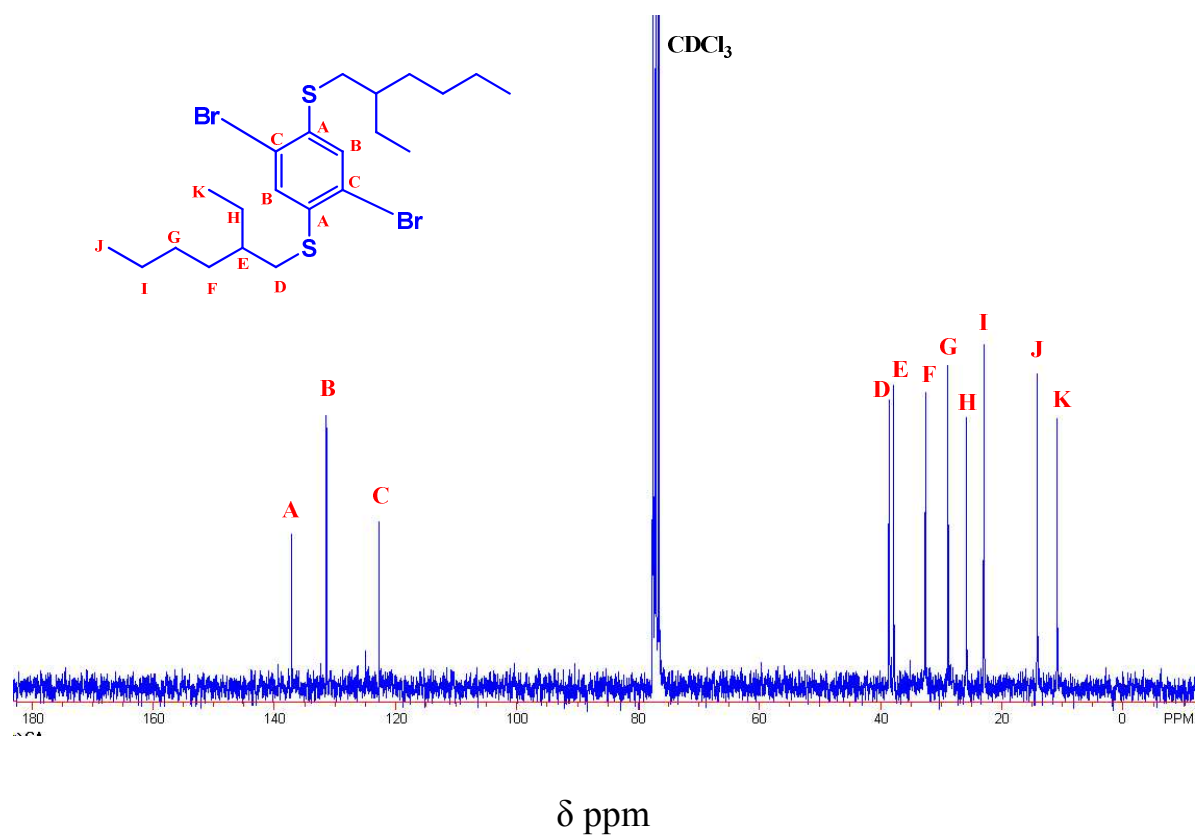

**Figure S6.**  $^{13}\text{C}$  NMR spectrum of 2,5-dibromo-1,4-bis-(2-ethylhexylthio)benzene (2).



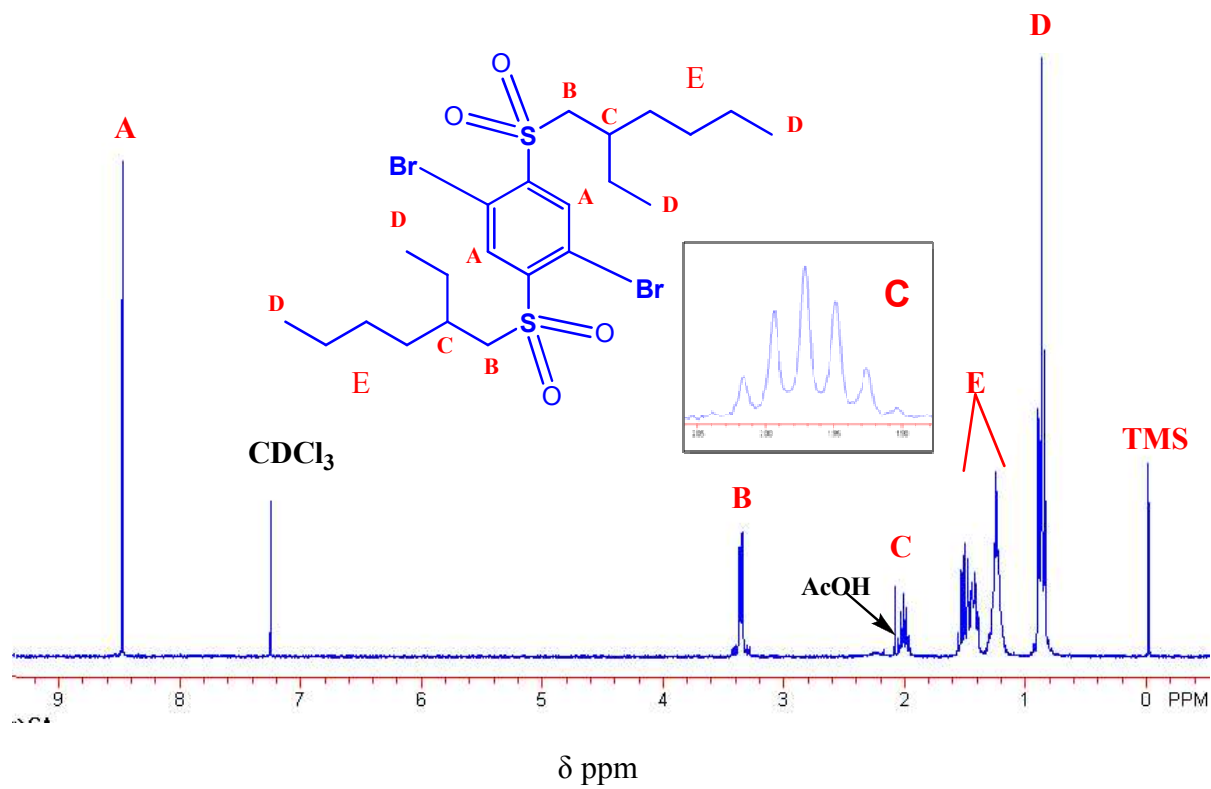

**Figure S7.**  $^1\text{H}$  NMR spectrum of 1,4-dibromo-2,5-bis(2-ethylhexylsulfonyl)benzene (**3**).

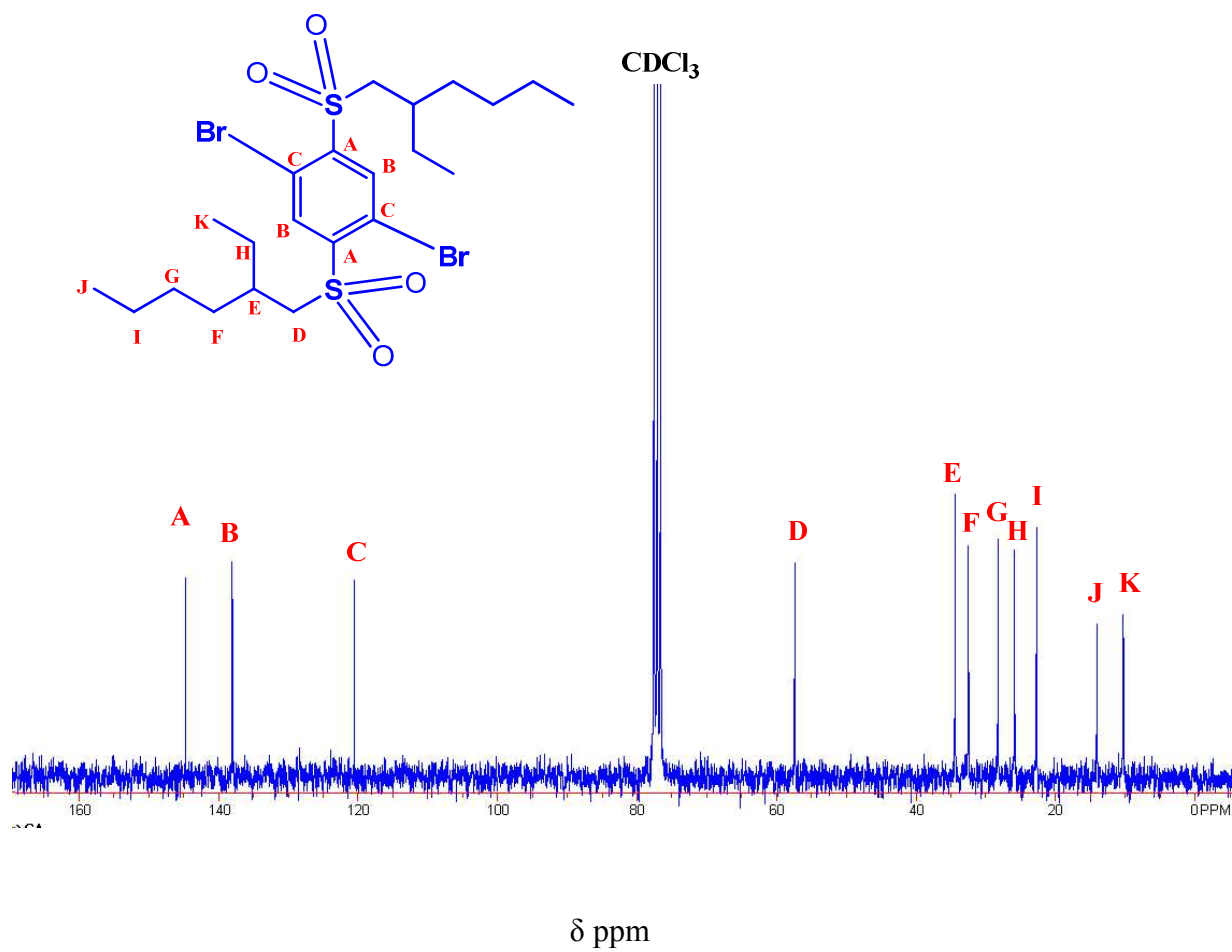

**Figure S8.**  $^{13}\text{C}$  NMR spectrum of 1,4-dibromo-2,5-bis(2-ethylhexylsulfonyl)benzene (**3**).
